# Supplementary material for: Facilitated extrinsic majority carrier depletion and photogenerated exciton dissociation in an annealing-free ZnO:C photodetector
Source: Royal Society of Chemistry journal article supplement (doi:10.1039/c8nr00214b), 2018-01-01
Supplement: c8nr00214b1.pdf [file c8nr00214b1.pdf]

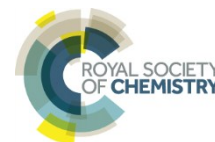

**Journal Name**

ARTICLE

**Supplementary Information**

## **Facilitated Extrinsic Majority Carrier Depletion and Photogenerated Exciton Dissociation in Annealing-Free ZnO:C Photodetector**

Dezhong Zhang,<sup>a</sup> Chunyu Liu,<sup>a</sup> Kanzhe Li,<sup>b</sup> Yu Chen,<sup>b</sup> Shengping Ruan<sup>\*a</sup> Xindong Zhang<sup>\*b</sup> and Chuannan Li,<sup>\*b</sup>

<sup>a</sup> State Key Laboratory on Integrated Optoelectronics, Jilin University, Changchun 130012, P. R. China

<sup>b</sup> College of Electronic Science & Engineering, Jilin University, Changchun 130012, P. R. China

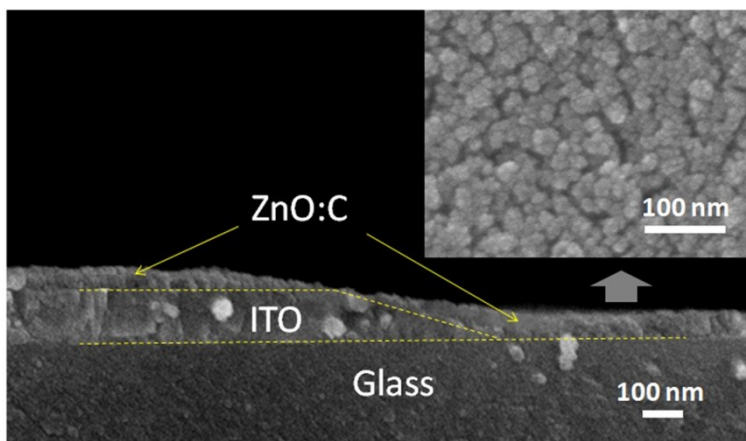

**Fig. S1** Cross-section SEM image of the ZnO:C composite film near an ITO electrode, inset is the surface SEM image of the ZnO:C layer on glass substrate.

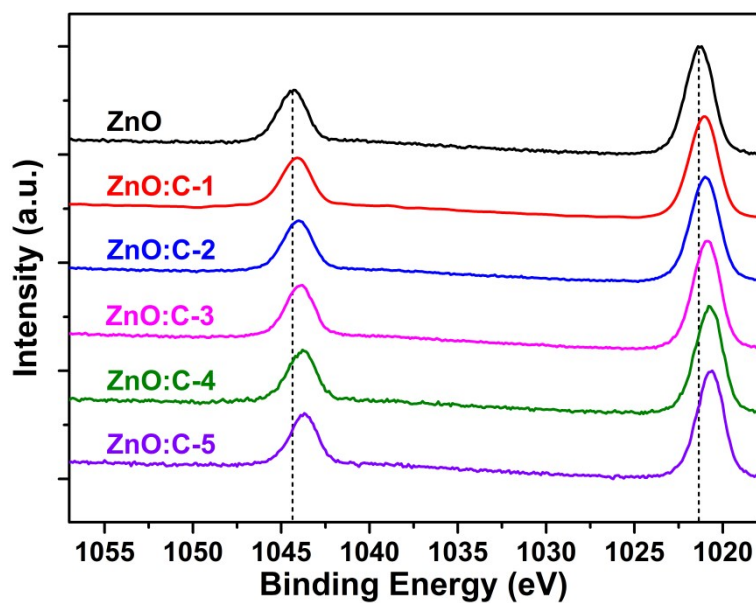

**Fig. S2** XPS high resolution survey scan of Zn 2p for ZnO and ZnO:C films.
